# Supplementary material for: YAP/TAZ Activation Drives Uveal Melanoma Initiation and Progression
Source: PubMed Central journal article supplement — Cell Rep. Author manuscript; Available in PMC 2021 Feb 9. (PMC7871510; doi:10.1016/j.celrep.2019.03.021), 2019-12-03
Supplement: NIHMS1545814-supplement-1.pdf [file NIHMS1545814-supplement-1.pdf]

**Cell Reports, Volume 29**

## **Supplemental Information**

### **YAP/TAZ Activation Drives Uveal Melanoma**

#### **Initiation and Progression**

**Huapeng Li, Qi Li, Kyvan Dang, Shan Ma, Jennifer L. Cotton, Sun Yang, Lihua J. Zhu, April C. Deng, Y. Tony Ip, Randy L. Johnson, Xu Wu, Claudio Punzo, and Junhao Mao**

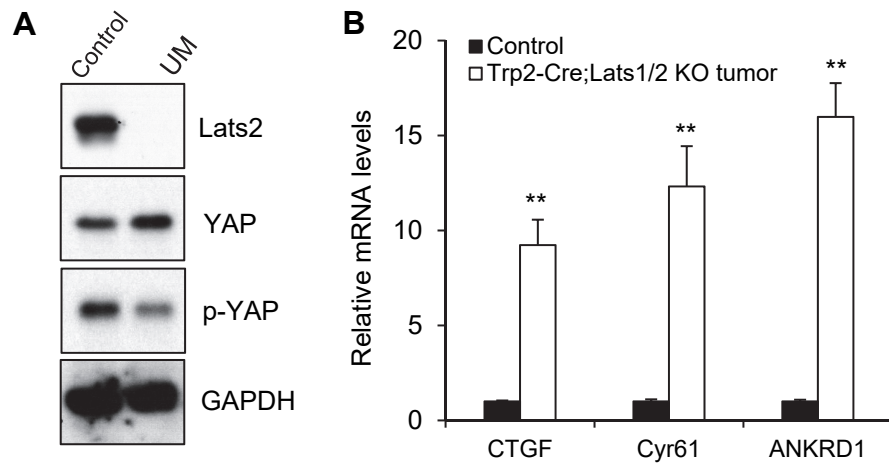

**Figure S1 (Related to Figure 2). Lats2 and YAP expression and YAP-mediated transcriptional activity in UM from AAV5-Trp2-GFPCre; Lats1/2 KO mice.**

(A) Immunoblot analysis of protein expression of Lats2, YAP, p-YAP and GAPDH in control tissues and AAV5-TRP2-GFPCre; Lats1/2 KO UMs using the antibodies against Lats2, p-YAP, YAP and GAPDH. (B) qPCR analysis of mRNA levels of *CTGF*, *Cyr61*, and *ANKRD1* in control and UM tissues. Data are mean  $\pm$  S.D., \*\* = p value  $\leq$  0.01.

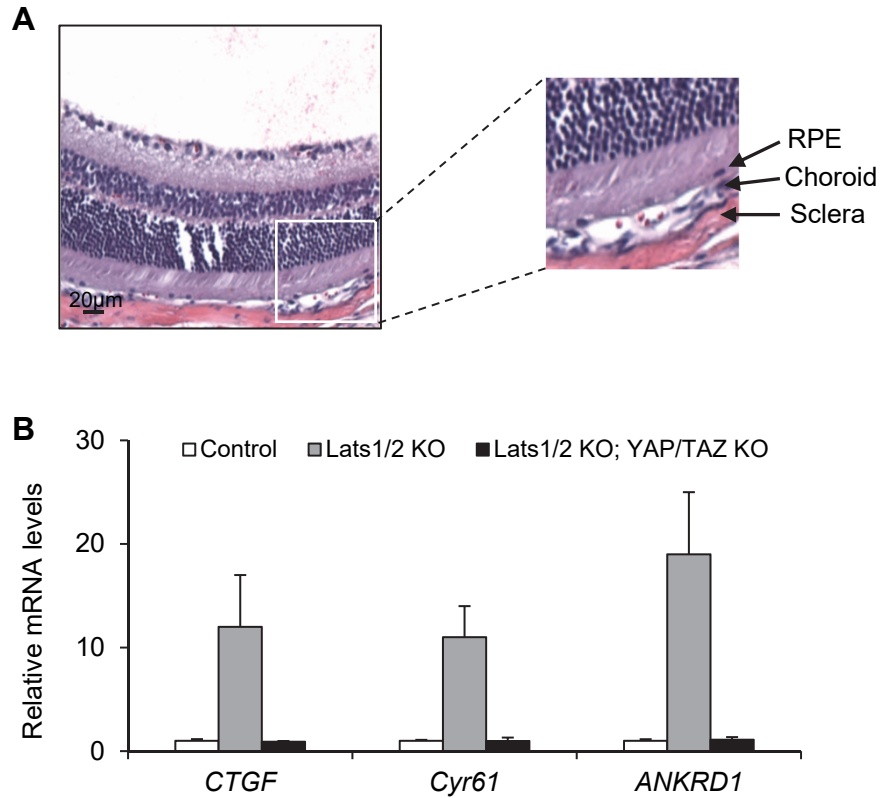

**Figure S2 (Related to Figure 3). YAP and TAZ are required for UM genesis induced by Lats1/2 deletion.**

(A) Representative histological images of the uveal tract in *AAV5-CMV-Cre;Lats1<sup>f/f</sup>;Lats2<sup>f/f</sup>;YAP<sup>f/f</sup>;TAZ<sup>f/f</sup>* (6 months after Cre injection) mice. (B) qPCR analysis of mRNA levels of *CTGF*, *Cyr61*, and *ANKRD1* in uveal tract tissues from control and *AAV5-CMV-Cre;Lats1<sup>f/f</sup>;Lats2<sup>f/f</sup>;YAP<sup>f/f</sup>;TAZ<sup>f/f</sup>* (Lats1/2 KO, YAP/TAZ KO) mice as well as UM from *AAV5-CMV-Cre;Lats1<sup>f/f</sup>;Lats2<sup>f/f</sup>* (Lats1/2 KO) mice.

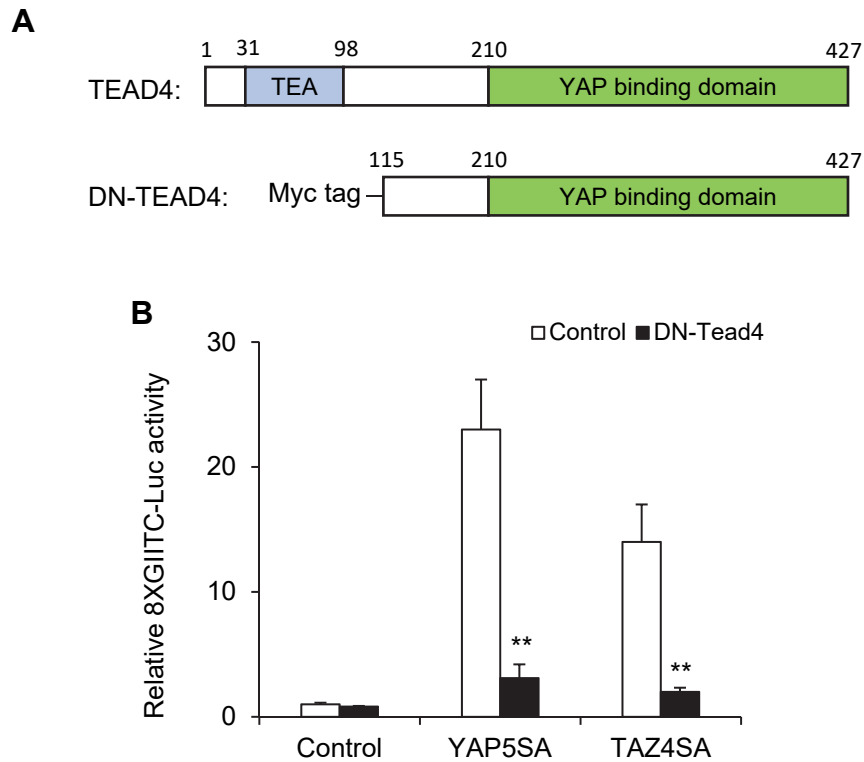

**Figure S3 (Related to Figure 4, 6, 7). DN-TEAD4 inhibits YAP and TAZ induced downstream gene transcription.**

(A) Schematic diagrams of TEAD4 and DN-TEAD4. DN-TEAD4 retains the entire YAP binding domain and carries a N-terminal myc tag. (B) The activity of TEAD-dependent 8XGIITC-Luc reporter in HEK293T cells expressing the activated forms of YAP (YAP5SA) or TAZ (TAZ4SA) with or without co-expression of DN-TEAD4. Data are mean  $\pm$  S.D., \*\* = p value  $\leq$  0.01.

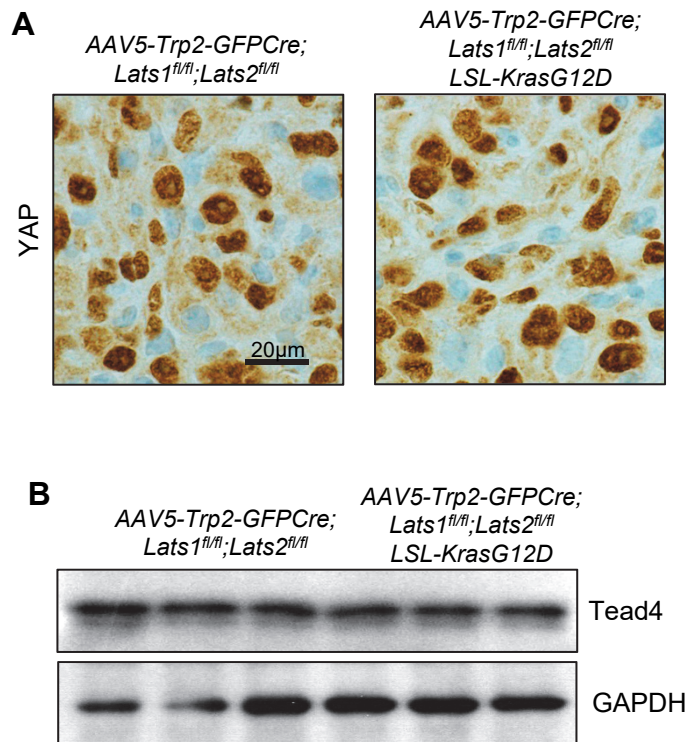

**Figure S4 (Related to Figure 5). YAP and Tead4 expression in UM with *Lats1/2* deletion and *Kras* activation.**

(A) Immunohistochemistry of YAP showing YAP nuclear localization in UMs from *AAV5-Trp2-GFPCre;Lats1<sup>fl/fl</sup>;Lats2<sup>fl/fl</sup>* and *AAV5-Trp2-GFPCre;Lats1<sup>fl/fl</sup>;Lats2<sup>fl/fl</sup>;LSL-Kras<sup>G12D</sup>* mice.

(B) Immunoblot analysis of Tead4 expression in UMs from *AAV5-Trp2-GFPCre;Lats1<sup>fl/fl</sup>;Lats2<sup>fl/fl</sup>* and *AAV5-Trp2-GFPCre;Lats1<sup>fl/fl</sup>;Lats2<sup>fl/fl</sup>;LSL-Kras<sup>G12D</sup>* mice.

**Table S2 (Related to STAR Methods). RT-qPCR and ChIP-qPCR Primers**

| qPCR Primers            | Sequence                    |
|-------------------------|-----------------------------|
| mouse CTGF forward      | TGTGCACTGCCAAAGATGGTGCAC    |
| mouse CTGF reverse      | TGGGCAGGCGCACGTCCATG        |
| mouse Cyr61 forward     | GAGGCTTCCTGTCTTTGGCAC       |
| mouse Cyr61 reverse     | ACTCTGGGTTGTCATTGGTAAC      |
| mouse ANKRD1 forward    | GGAACAACGGAAAAGCGAGAA       |
| mouse ANKRD1 reverse    | GAAACCTCGGCACATCCACA        |
| mouse Lats1 forward     | CTTCTCTTCACATCCCTCCTCAAGC   |
| mouse Lats1 reverse     | AGCCTTTATCTCATCAGCACCGTTC   |
| mouse Lats2 forward     | ATCCTCCCAAAGGGTACAGCACAG    |
| mouse Lats2 reverse     | TGGTGGCGTCTTGTTCTGGAAG      |
| mouse YAP forward       | AAATGCTCCAAAATGTCAGGA       |
| mouse YAP reverse       | CATTCGGAGTCCCTCCATC         |
| mouse TAZ forward       | TGCTACAGTGTCACCCACAAC       |
| mouse TAZ reverse       | TGACCGGAATTTTCACCTGT        |
| mouse TEAD1 forward     | CATCGCAGGGTGTGTCAGTGTGA     |
| mouse TEAD1 reverse     | AGGCTGGCGGCTACAAGGTA        |
| mouse TEAD4 forward     | AGGCCGGCACCATACCTC          |
| mouse TEAD4 reverse     | TGGATCTCCCGGGCTTTTC         |
| mouse Pkrcd forward     | CAGACCAAGGACCACCTGTT        |
| mouse Pkrcd reverse     | GCATAAAACGTAGCCCGGTA        |
| mouse Nras forward      | TGACGATGGCACTCAAGGTTGTATGGG |
| mouse Nras reverse      | CCAGGGATGTCAGAACCAGGGCA     |
| mouse Rras2 forward     | GTGGATGGCTTCTGACTTTG        |
| mouse Rras2 reverse     | AAACTTCAATGGGGCTGTTG        |
| mouse RasGRP1 forward   | GGCTTTCCA CACAACCTTC        |
| mouse RasGRP1 reverse   | TCATCCCGCAGTCTTTAC          |
| mouse Myc forward       | TGAGCCCCTAGTGCTGCAT         |
| mouse Myc reverse       | AGCCCGACTCCGACCTCTT         |
| mouse Cyclin D1 forward | CTCTGGCTCTGTGCCTTTCT        |
| mouse Cyclin D1 reverse | CCGGAGACTCAGAGCAAATC        |
| mouse cJun forward      | AAGCGCAAACTCCGAGCT          |
| mouse cJun reverse      | CATGAGTTGGCACCCACTGT        |
| mouse JunB forward      | GGAGGACAAGGTGAAGACTCA       |
| mouse JunB reverse      | GGCAAGGGAGGCTCTCAGA         |

|                       |                           |
|-----------------------|---------------------------|
| mouse JunD forward    | GACACGCAAGAACGCATCAA      |
| mouse JunD reverse    | TTGACGTGGCTGAGGACTTTC     |
| mouse Fos forward     | TGGCCCTGTGAGCAGTCA        |
| mouse Fos reverse     | AGCCTGGTGTGTTTCACGAAC     |
| mouse FosL1 forward   | GAGACGCGAGCGGAACAAG       |
| mouse FosL1 reverse   | CTTCCAGCACCAGCTCAAGG      |
| mouse FosL2 forward   | TTATCCCGGGAAC TTGACACCTC  |
| mouse FosL2 reverse   | CGGCGTTCCTCGGGGCTGATT     |
| mouse GAPDH forward   | GTGAAGGTCGGTGTGAACG       |
| mouse GAPDH reverse   | ATTTGATGTTAGTGGGGTCTCG    |
| human CTGF forward    | TGCCCTCGCGGCTTACCGACTG    |
| human CTGF reverse    | TGCAGGAGGCGTTGTCATTGGTAAC |
| human CYR61 forward   | GAGTGGGTCTGTGACGAGGAT     |
| human CYR61 reverse   | GGTTGTATAGGATGCGAGGCT     |
| human ANKRD1 forward  | CGAGATAAGTTGCTCAGCACAG    |
| human ANKRD1 reverse  | GTTTCAGTCTCACCGCATCATG    |
| human PKRCD forward   | AAAGGCAGCTTCGGGAAGGT      |
| human PKRCD reverse   | TGGATGTGGTACATCAGGTC      |
| human NRAS forward    | AGCAGGTGGTGTGGGAAAA       |
| human NRAS reverse    | TGTCCAACAAACAGGTTTCACC    |
| human RRAS2 forward   | AGCACGGCAGCTTAAGGTAA      |
| human RRAS2 reverse   | CTTTCCGTGTTGGTTCTGGT      |
| human RASGRP1 forward | GGCTCAAGGAGACAAGTTCG      |
| human RASGRP1 reverse | GAAGTCGGTGC ACTCTCCATA    |
| human RASGRP3 forward | CTCTGCATGTATCGAAATGCCA    |
| human RASGRP3 reverse | CTACTTCCCGAAATTCCTCAGTC   |
| human cJun forward    | ATCAAGGCGGAGAGGAAGCG      |
| human cJun reverse    | TGAGCATGTTGGCCGTGGAC      |
| human JunB forward    | ATCCCTATCGGGGTCTCAAG      |
| human JunB reverse    | CCTGTGTCTGATCCCTGACC      |
| human JunD forward    | TCGCGCCTGGAAGAGAAAGTGAAG  |
| human JunD reverse    | CCGCTGTTGACGTGGCTGAGG     |
| human Fos forward     | CTGGCGTTGTGAAGACCAT       |
| human Fos reverse     | TCCCTTCGGATTCTCCTTTT      |
| human FosL1 forward   | CAAGGAGGGGACACAGGCAGTA    |
| human FosL1 reverse   | TGAAAGGAGTTAGGGAGGGTGTGG  |

|                          |                         |
|--------------------------|-------------------------|
| human FosL2 forward      | ACGGCCCAGTGTGCAAGATTAGC |
| human FosL2 reverse      | AGCCCCGCCGACGAGGAC      |
| human Myc forward        | CGTCTCCACACATCAGAGCACAA |
| human Myc reverse        | TCTTGGCAGCAGGATAGTCCTT  |
| human Cyclin D1 forward  | TGCATGTTTCGTGGCCTCTAA   |
| human Cyclin D1 reverse  | TCGGTGTAGATGCACAGCTT    |
| human BirC5 forward      | ACCACCGCATCTCTAC        |
| human BirC5 reverse      | TCCTCTATGGGGTCGT        |
| human GAPDH forward      | ATGGGGAAGGTGAAGGTCG     |
| human GAPDH reverse      | GGGGTCATTGATGGCAACAATA  |
|                          |                         |
| <b>ChIP-qPCR Primers</b> | <b>Sequence</b>         |
| mouse Cyr61 forward      | CTCTGATGGATCTGAGAAGAGG  |
| mouse Cyr61 reverse      | GCCCTTTATAATGCCTGCCTA   |
| mouse Ctgf forward       | CAATCCGGTGTGAGTTGATG    |
| mouse Ctgf reverse       | GGCGCTGGCTTTTATACG      |
| mouse Ankr1 forward      | TCAGACGCACATTTTTCTCG    |
| mouse Ankr1 reverse      | GGCAGCCGTGAGTCTATGTT    |
| mouse Nras forward       | TGCAGCTTCTAGGACCCAGT    |
| mouse Nras reverse       | TACCTCAAACCTCCGCAGACC   |
| mouse Rras2 forward      | AGGCTGGCCTTGAACCTTT     |
| mouse Rras2 reverse      | CGGGAGGAGAAGGAAGAAAC    |
| mouse Pkrcd forward      | CCTCTTGTATCCTCCCAGGAA   |
| mouse Pkrcd reverse      | GCGTCTCAGCCTCTTTGAGT    |
| mouse RasGRP1 forward    | GAAATGCACGCGTTATAGCA    |
| mouse RasGRP1 reverse    | GAATCCTGCCCCATTACTT     |
| mouse GADPH forward      | GCCTCTGCGCCCTTGAGCTA    |
| mouse GADPH reverse      | GATGCGGCCGTCTCTGGAAC    |
